# Supplementary material for: Nomogram including renal pelvic pressure to predict the occurrence of urosepsis following percutaneous nephrolithotomy: a dual center retrospective study of 1,448 patients
Source: PubMed Central journal article supplement — Transl Androl Urol. 2024 May 28;13(5):667–78. doi: 10.21037/tau-23-616 (PMC11157403; doi:10.21037/tau-23-616), 2024-05-28
Supplement: tau-13-05-667-dss.pdf [file tau-13-05-667-dss.pdf]

## Data Sharing Statement

|                     |                                                                                                                                                     |                                                                                                                  |
|---------------------|-----------------------------------------------------------------------------------------------------------------------------------------------------|------------------------------------------------------------------------------------------------------------------|
| <b>Article Info</b> | <a href="https://dx.doi.org/10.21037/tau-23-616">https://dx.doi.org/10.21037/tau-23-616</a>                                                         |                                                                                                                  |
| <b>Item</b>         | <b>Question</b>                                                                                                                                     | <b>Authors' Response<br/>(place "-" if not applicable)</b>                                                       |
| 1                   | Would you like to share data collected for your study to others?                                                                                    | Yes.                                                                                                             |
| 2                   | If not, would you like to share the reason for your decision?                                                                                       | -                                                                                                                |
| 3                   | What data in particular will be shared?                                                                                                             | The clinical data of patients.                                                                                   |
| 4                   | Any other documents will be shared? Such as study protocol, statistical analysis plan, informed consent form, clinical study report, analytic code. | Statistical analysis plan will also be shared if requested.                                                      |
| 5                   | When will data availability begin?                                                                                                                  | From the publication date.                                                                                       |
| 6                   | When will data availability end?                                                                                                                    | Two years within the publication date.                                                                           |
| 7                   | To whom will you share the data?                                                                                                                    | Urologists.                                                                                                      |
| 8                   | For what type of analysis or purpose?                                                                                                               | To predict the urosepsis after PCNL.                                                                             |
| 9                   | How or where can the data/documents be obtained?                                                                                                    | Emails can be sent to xhxdoc@163.com                                                                             |
| 10                  | Any other restrictions?                                                                                                                             | We may balance the potential benefits and risks for each request and then provide the data that could be shared. |
