# Supplementary material for: Nomogram including renal pelvic pressure to predict the occurrence of urosepsis following percutaneous nephrolithotomy: a dual center retrospective study of 1,448 patients
Source: PubMed Central journal article supplement — Transl Androl Urol. 2024 May 28;13(5):667–78. doi: 10.21037/tau-23-616 (PMC11157403; doi:10.21037/tau-23-616), 2024-05-28
Supplement: tau-13-05-667-supplementary.pdf [file tau-13-05-667-supplementary.pdf]

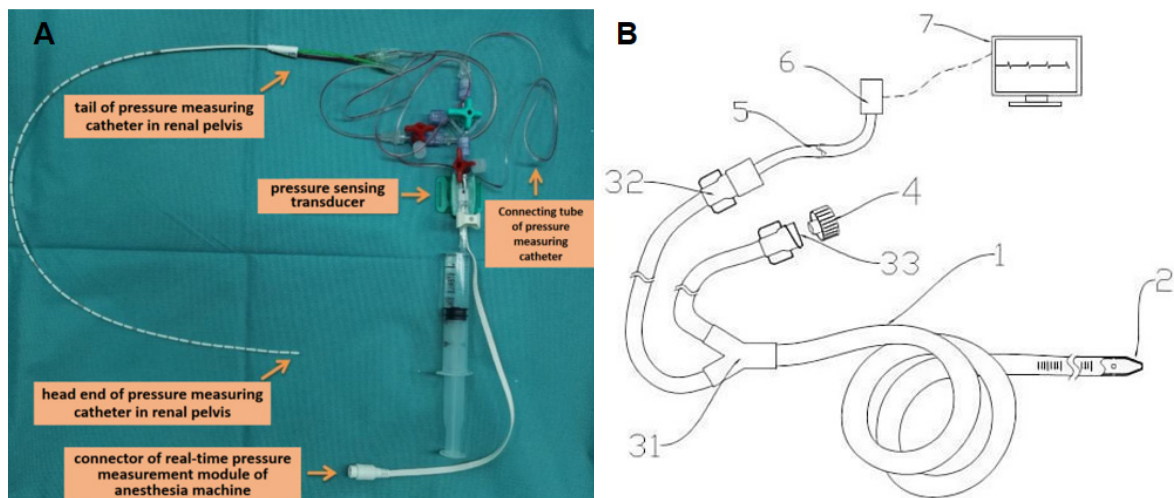

**Figure S1** Renal pelvis pressure measuring components and schematic diagram. (A) The pressure measuring component in the renal pelvis. (B) Diagram of the first connector connected to the pressure measurement module. 1: the body of catheter; 2: the head of catheter; 31: branch joint; 32: the first connector; 33: the second connector; 4: Interface protection cap; 5: extension tube; 6: pressure transducer; 7: pressure measurement module.

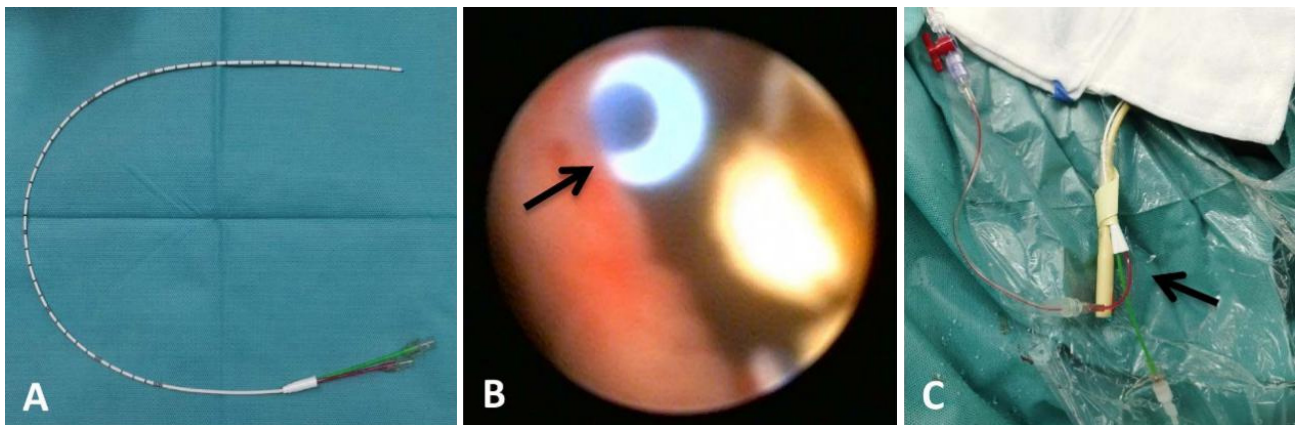

**Figure S2** Manometry catheter in the renal pelvis. (A) The pressure measuring catheter in the renal pelvis. (B) The pressure measuring catheter placed in the renal pelvis adjacent to the calculus, the arrow points to the head end. (C) The arrow indicates the external part of the pressure measuring catheter in the renal pelvis.
